# Supplementary material
Source: HighWire-hosted journal article supplement (https://bmjopenquality.bmj.com/highwire/filestream/147595/field_highwire_adjunct_files/0/bmjqs-2014-003910supp.pdf)

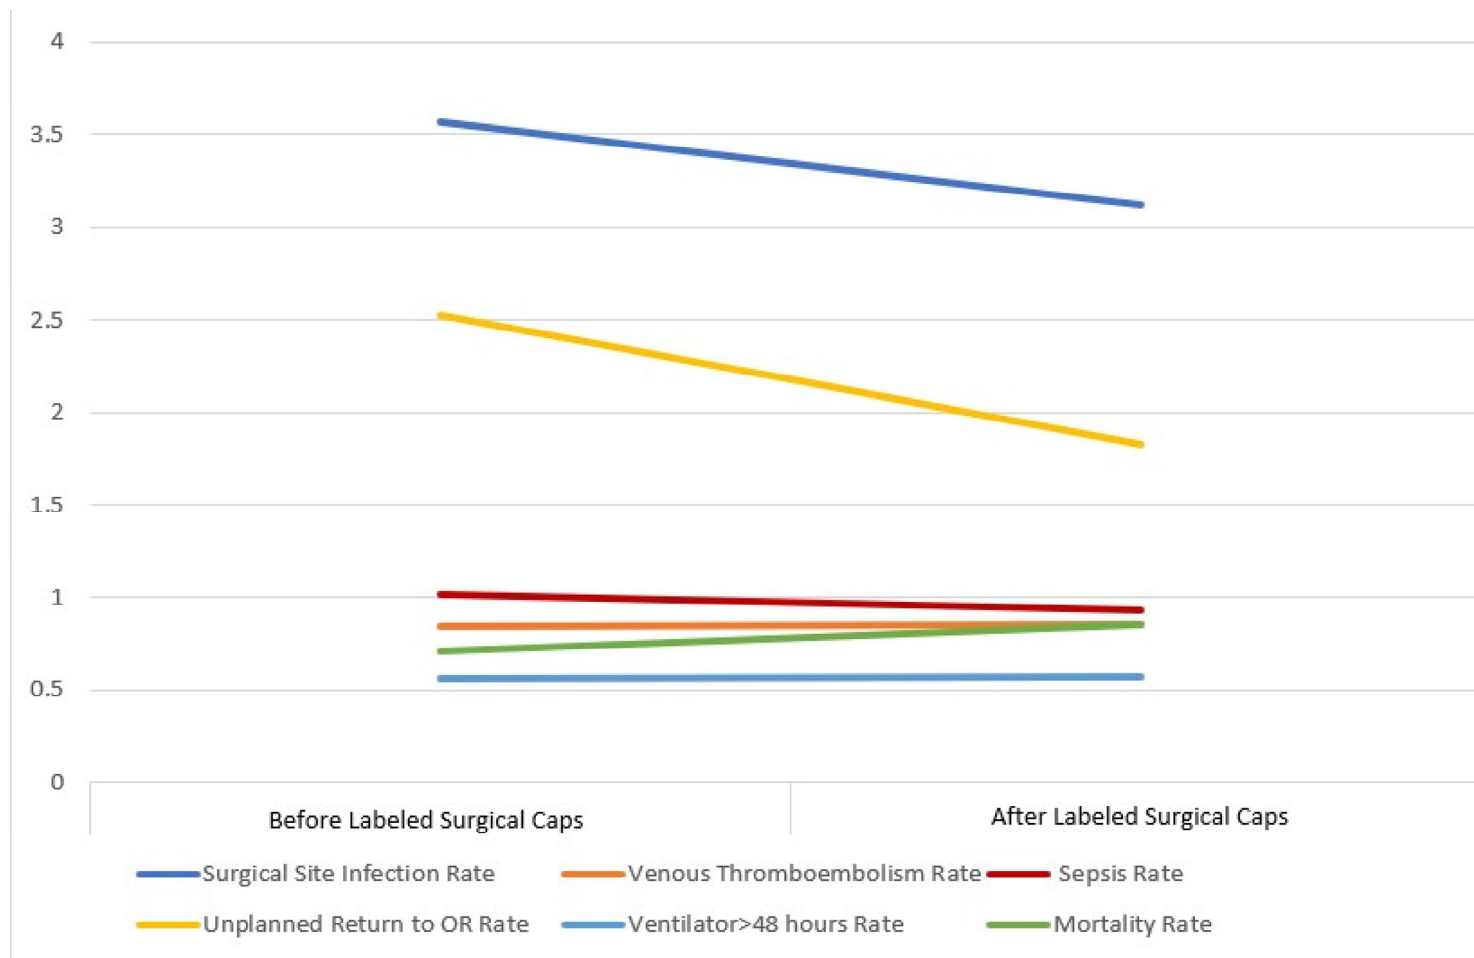

Supplement: bmjqs-2014-003910supp.pdf [file bmjqs-2014-003910supp.pdf]
